# Supplementary material
Source: Springer Nature journal article supplement (https://www.springermedizin.de/resource/supplementary/13063_2011_954_MOESM3_ESM.pdf/9619220)

a)

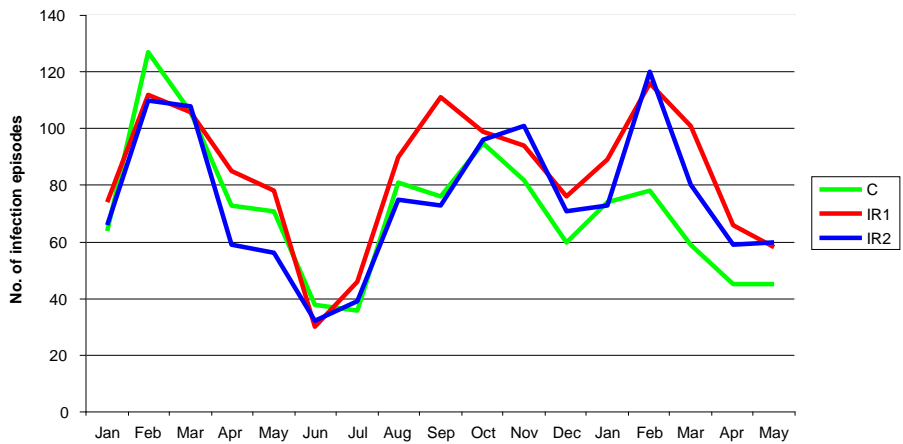

b)

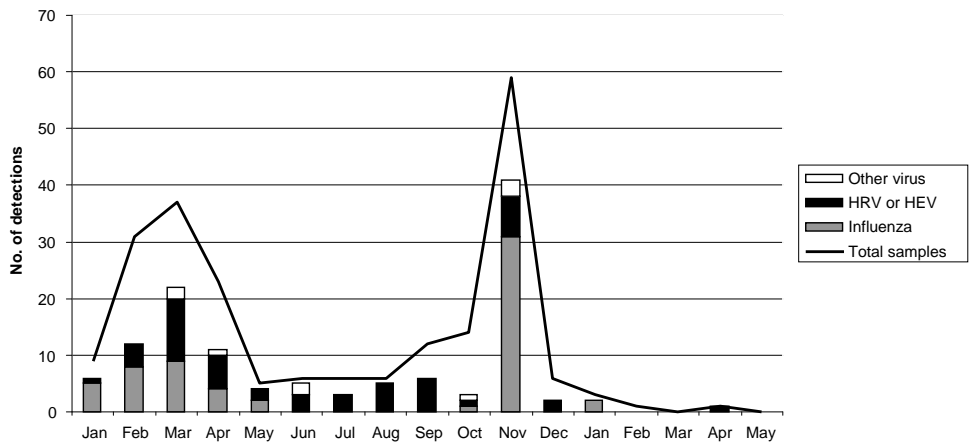

c)

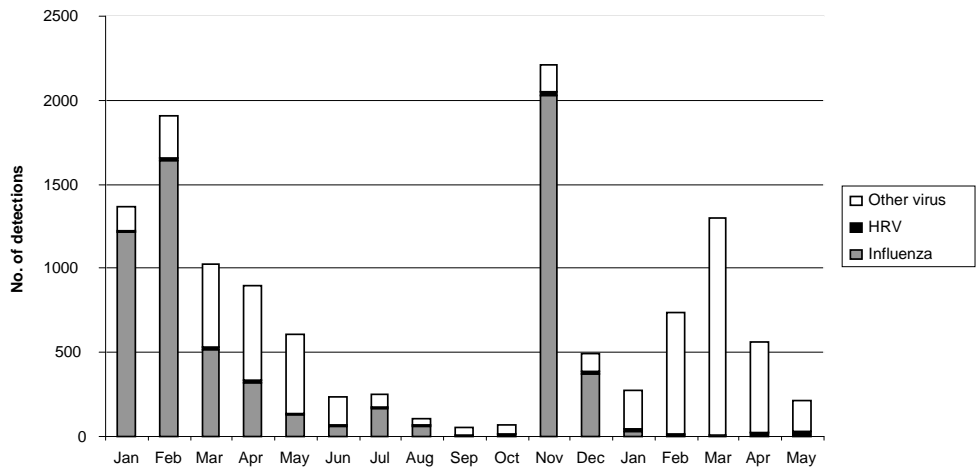

Supplement: MOESM3 [file 9619220]
